# Supplementary material for: Mitochondrial DNA abnormalities provide mechanistic insight and predict reactive oxygen species-stimulating drug efficacy
Source: Springer Nature journal article supplement (doi:10.1186/s12885-021-08155-2), 2021-04-17
Supplement: MOESM1 [file 19079274]

# **Mitochondrial DNA abnormalities provide mechanistic insight and predict reactive oxygen species-stimulating drug efficacy**

Tarek Zaidieh\*, James R. Smith, Karen E. Ball, Qian An\*

School of Pharmacy and Biomedical Sciences, Institute of Biological and Biomedical Sciences,  
University of Portsmouth, Portsmouth PO1 2DT, UK.

\*Joint corresponding authors

## Supplementary information

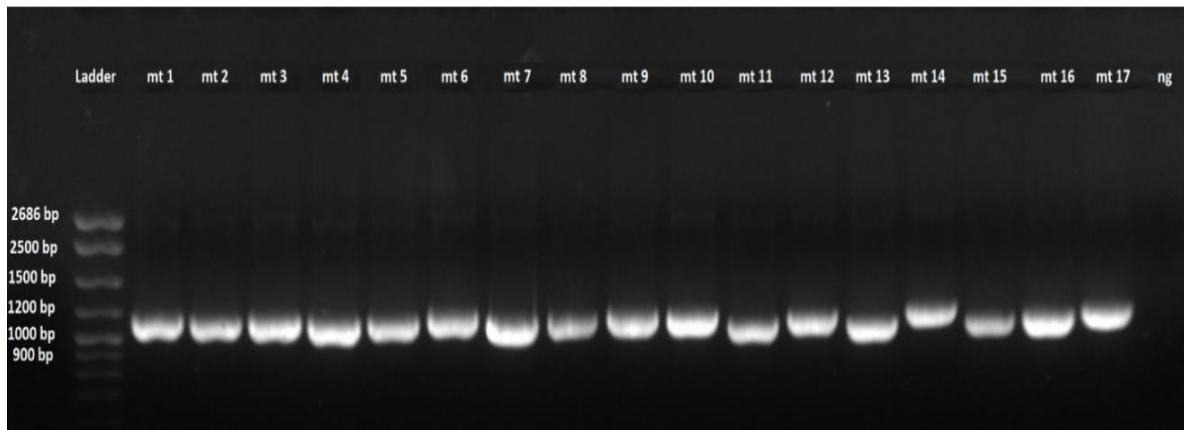

**Figure S1.** Representative image of agarose gel electrophoresis of PCR products amplified using 17 pairs of primers. This image was obtained from one single gel without any grouping or cropping. mt 1-17: seventeen fragments (~ 1,1 kb each) of mitochondrial genome; ng: negative control.

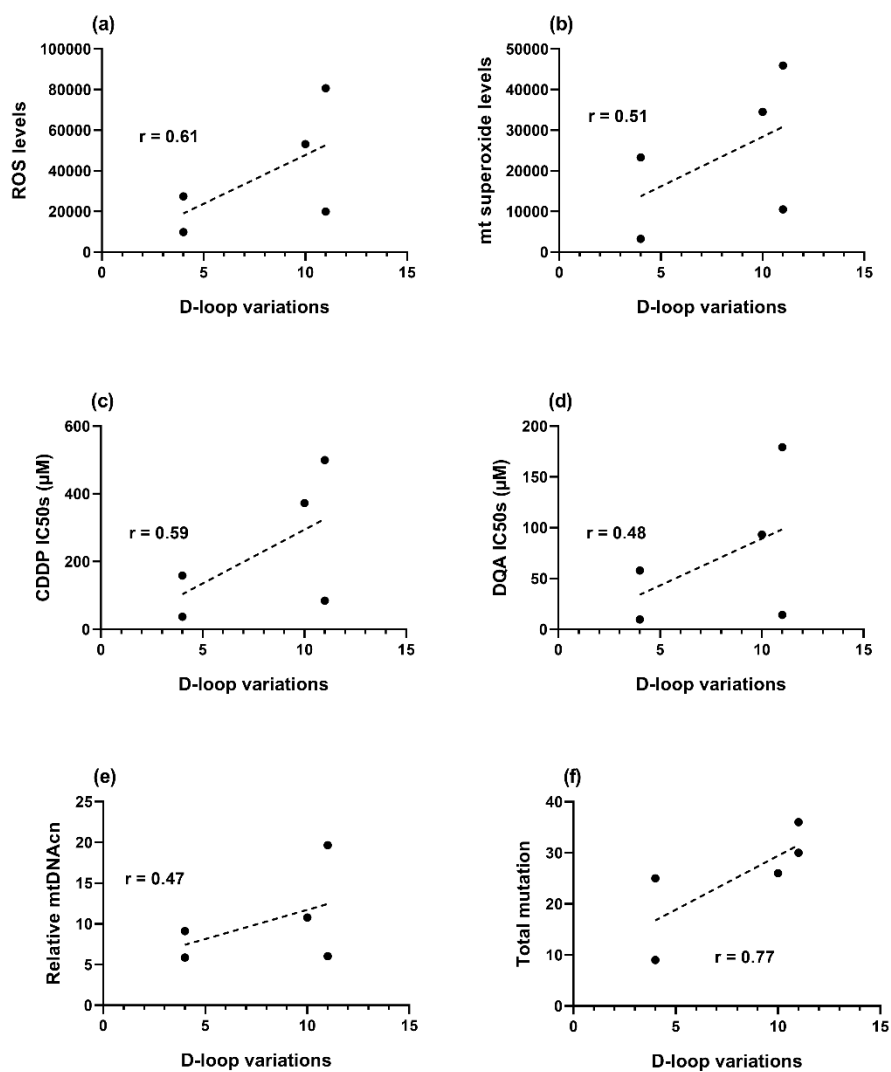

**Figure S2.** Correlation between the D-loop variations and the baseline intracellular ROS level (a), mitochondrial superoxide level (b), drug resistance against CDDP (c) and DQA (d), relative content of mtDNA (e) and the total number of variations (f). Data points representing the cell lines are in the sequence of PNT-2, Ishikawa, MDA-MB-231, PC-3 and Caco-2. r value was calculated using the Pearson correlation coefficient method.

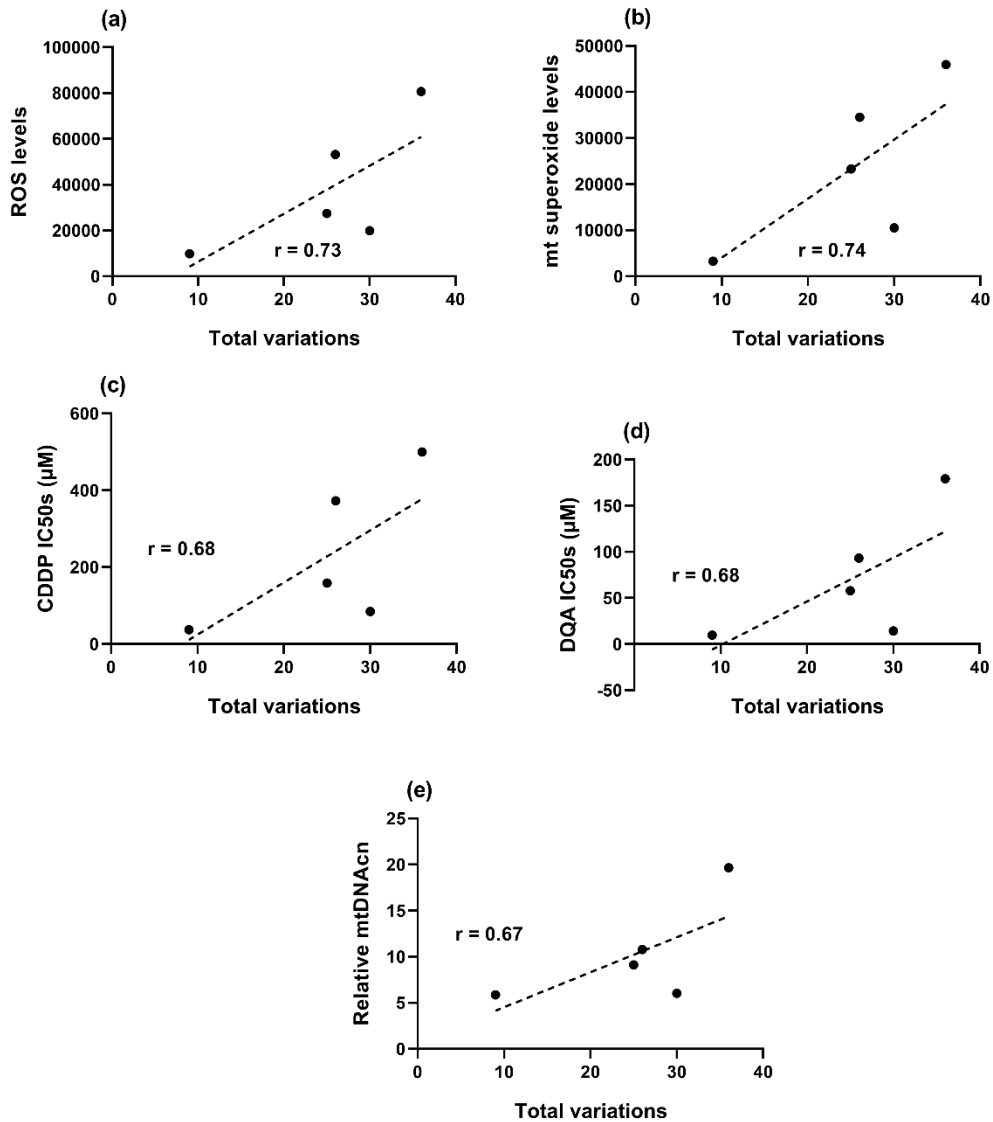

**Figure S3.** Correlation between the total variations and the baseline intracellular ROS level (a), mitochondrial superoxide level (b), drug resistance against CDDP (c) and DQA (d) and relative content of mtDNA. Data points representing the cell lines are in the sequence of PNT-2, Ishikawa, MDA-MB-231, PC-3 and Caco-2. r value was calculated using the Pearson correlation coefficient method.

**Table S1.** List of common variations identified in the 5 cell lines.

| Variations | PNT-2 | Ishikawa | MDA-MB-231 | PC-3 | Caco-2 | Region            | Variation type     | Amino acid change |
|------------|-------|----------|------------|------|--------|-------------------|--------------------|-------------------|
| A73G       |       | ✓        |            | ✓    | ✓      | D-loop            | Non-protein coding |                   |
| T195C      |       |          | ✓          | ✓    |        | D-loop            | Non-protein coding |                   |
| A263G      |       | ✓        | ✓          | ✓    | ✓      | D-loop            | Non-protein coding |                   |
| 310InsC    |       | ✓        | ✓          | ✓    |        | D-loop            | Non-protein coding |                   |
| A750G      | ✓     | ✓        | ✓          | ✓    | ✓      | 12S ribosomal RNA | Non-protein coding |                   |
| A1438G     | ✓     | ✓        |            | ✓    | ✓      | 12S ribosomal RNA | Non-protein coding |                   |
| A2706G     |       | ✓        | ✓          | ✓    | ✓      | 16S ribosomal RNA | Non-protein coding |                   |
| 2800InsA   |       | ✓        | ✓          |      |        | 16S ribosomal RNA | Non-protein coding |                   |
| 3107delN   |       | ✓        | ✓          |      | ✓      | 16S ribosomal RNA | Non-protein coding |                   |
| A4769G     | ✓     | ✓        | ✓          | ✓    | ✓      | Complex I         | Synonymous         |                   |
| C7028T     |       | ✓        | ✓          | ✓    | ✓      | Complex IV        | Synonymous         |                   |
| A8860G     | ✓     | ✓        | ✓          | ✓    | ✓      | Complex V         | Non-synonymous     | Thr - Ala         |
| G11719A    |       | ✓        | ✓          | ✓    | ✓      | Complex I         | Synonymous         |                   |
| G12372A    |       | ✓        |            | ✓    |        | Complex I         | Synonymous         |                   |
| C12705T    |       | ✓        | ✓          |      |        | Complex I         | Synonymous         |                   |
| G13708A    |       |          |            | ✓    | ✓      | Complex I         | Non-synonymous     | Ala-Thr           |
| C14766T    |       | ✓        | ✓          | ✓    | ✓      | Complex III       | Non-synonymous     | Thr -Ile          |
| A15326G    | ✓     | ✓        | ✓          |      | ✓      | Complex III       | Non-synonymous     | Thr -Ala          |
| T16172C    |       | ✓        |            | ✓    |        | D-loop            | Non-protein coding |                   |
| C16261T    |       | ✓        |            |      | ✓      | D-loop            | Non-protein coding |                   |

**Table S2.** List of unique variations identified in the 5 cell lines.

| Variations | PNT-2 | Ishikawa | MDA-MB-231 | PC-3 | Caco-2 | Region            | Variation type     | Amino acid change |
|------------|-------|----------|------------|------|--------|-------------------|--------------------|-------------------|
| 513InsCA   | ✓     |          |            |      |        | D-loop            | Non-protein coding |                   |
| G16319A    | ✓     |          |            |      |        | D-loop            | Non-protein coding |                   |
| T16325C    | ✓     |          |            |      |        | D-loop            | Non-protein coding |                   |
| T16519C    | ✓     |          |            |      |        | D-loop            | Non-protein coding |                   |
| C150T      |       | ✓        |            |      |        | D-loop            | Non-protein coding |                   |
| C338T      |       | ✓        |            |      |        | D-loop            | Non-protein coding |                   |
| T961C      |       | ✓        |            |      |        | 12S ribosomal RNA | Non-protein coding |                   |
| A1937C     |       | ✓        |            |      |        | 16S ribosomal RNA | Non-protein coding |                   |
| T3394C     |       | ✓        |            |      |        | Complex I         | Non-synonymous     | Tyr - His         |
| G5231A     |       | ✓        |            |      |        | Complex I         | Synonymous         |                   |
| G5417A     |       | ✓        |            |      |        | Complex I         | Synonymous         |                   |
| T14968C    |       | ✓        |            |      |        | Complex III       | Synonymous         |                   |
| C16223T    |       | ✓        |            |      |        | D-loop            | Non-protein coding |                   |
| C16257A    |       | ✓        |            |      |        | D-loop            | Non-protein coding |                   |
| T16304C    |       | ✓        |            |      |        | D-loop            | Non-protein coding |                   |
| A16497G    |       | ✓        |            |      |        | D-loop            | Non-protein coding |                   |
| A153G      |       |          | ✓          |      |        | D-loop            | Non-protein coding |                   |
| 646InsA    |       |          | ✓          |      |        | tRNA-Phe          | Non-protein coding |                   |
| 653InsT    |       |          | ✓          |      |        | 12S ribosomal RNA | Non-protein coding |                   |
| G709A      |       |          | ✓          |      |        | 12S ribosomal RNA | Non-protein coding |                   |

| Variations | PNT-2 | Ishikawa | MDA-MB-231 | PC-3 | Caco-2 | Region            | Variation type     | Amino acid change |
|------------|-------|----------|------------|------|--------|-------------------|--------------------|-------------------|
| G1719A     |       |          | ✓          |      |        | 16S ribosomal RNA | Non-protein coding |                   |
| T6221C     |       |          | ✓          |      |        | Complex IV        | Synonymous         |                   |
| T8506C     |       |          | ✓          |      |        | Complex V         | Synonymous         |                   |
| C12084T    |       |          | ✓          |      |        | Complex I         | Non-synonymous     | Ser - Phe         |
| A13966G    |       |          | ✓          |      |        | Complex I         | Non-synonymous     | Thr - Ala         |
| T14470C    |       |          | ✓          |      |        | Complex I         | Synonymous         |                   |
| T15310C    |       |          | ✓          |      |        | Complex III       | Synonymous         |                   |
| T11120C    |       |          | ✓          |      |        | Complex I         | Non-synonymous     | Phe - Leu         |
| A11467G    |       |          | ✓          |      |        | Complex I         | Synonymous         |                   |
| A12308G    |       |          | ✓          |      |        | tRNA-Leu          | Non-protein coding |                   |
| T13617C    |       |          | ✓          |      |        | Complex I         | Synonymous         |                   |
| C13802T    |       |          | ✓          |      |        | Complex I         | Non-synonymous     | Thr - Met         |
| A14793G    |       |          | ✓          |      |        | Complex III       | Non-synonymous     | His - Arg         |
| C16192T    |       |          | ✓          |      |        | D-loop            | Non-protein coding |                   |
| C16256T    |       |          | ✓          |      |        | D-loop            | Non-protein coding |                   |
| C16270T    |       |          | ✓          |      |        | D-loop            | Non-protein coding |                   |
| C16320T    |       |          | ✓          |      |        | D-loop            | Non-protein coding |                   |
| A16399G    |       |          | ✓          |      |        | D-loop            | Non-protein coding |                   |
| G47A       |       |          |            | ✓    | ✓      | D-loop            | Non-protein coding |                   |

| Variations | PNT-2 | Ishikawa | MDA-MB-231 | PC-3 | Caco-2 | Region      | Variation type     | Amino acid change |
|------------|-------|----------|------------|------|--------|-------------|--------------------|-------------------|
| G185A      |       |          |            |      | ✓      | D-loop      | Non-protein coding |                   |
| G228A      |       |          |            |      | ✓      | D-loop      | Non-protein coding |                   |
| C295T      |       |          |            |      | ✓      | D-loop      | Non-protein coding |                   |
| C462T      |       |          |            |      | ✓      | D-loop      | Non-protein coding |                   |
| T489C      |       |          |            |      | ✓      | D-loop      | Non-protein coding |                   |
| T4216C     |       |          |            |      | ✓      | Complex I   | Non-synonymous     | Tyr - His         |
| C6464A     |       |          |            |      | ✓      | Complex IV  | Synonymous         |                   |
| C6554T     |       |          |            |      | ✓      | Complex IV  | Synonymous         |                   |
| G7977C     |       |          |            |      | ✓      | Complex IV  | Non-synonymous     | Gly - Ala         |
| A10398G    |       |          |            |      | ✓      | Complex I   | Non-synonymous     | Thr - Ala         |
| A11251G    |       |          |            |      | ✓      | Complex I   | Synonymous         |                   |
| G12127A    |       |          |            |      | ✓      | Complex I   | Synonymous         |                   |
| A12612G    |       |          |            |      | ✓      | Complex I   | Synonymous         |                   |
| A13681G    |       |          |            |      | ✓      | Complex I   | Non-synonymous     | Thr - Ala         |
| T14798C    |       |          |            |      | ✓      | Complex III | Non-synonymous     | Phe - Leu         |
| A14927G    |       |          |            |      | ✓      | Complex III | Non-synonymous     | Thr - Ala         |
| A14959G    |       |          |            |      | ✓      | Complex III | Synonymous         |                   |
| C15452A    |       |          |            |      | ✓      | Complex III | Non-synonymous     | Leu - Ile         |
| C16069T    |       |          |            |      | ✓      | D-loop      | Non-protein coding |                   |
| T16126C    |       |          |            |      | ✓      | D-loop      | Non-protein coding |                   |

**Table S3.** Summary of frequency in healthy tissues and heritability of functional variations identified in the 5 cell lines.

| Variations | 3D Prediction  | HmtDB*                         |                               |        | mtDB*                          |                               |        | MitoMap* |                               |                                                |
|------------|----------------|--------------------------------|-------------------------------|--------|--------------------------------|-------------------------------|--------|----------|-------------------------------|------------------------------------------------|
|            |                | No. of complete genome entries | No. of entries with variation | Freq % | No. of complete genome entries | No. of entries with variation | Freq % | Freq %   | Reported as somatic variation | Variants found in haplogroups at 50% or higher |
| T3394C     | Non-functional | 44058                          | 475                           | 1.08   | 2704                           | 39                            | 1.44   | 1.24     | Yes                           | Yes                                            |
| T4216C     | Non-functional | 44058                          | 4334                          | 9.84   | 2704                           | 244                           | 9.02   | 9.97     | Yes                           | Yes                                            |
| A10398G    | Functional     | 44058                          | 77                            | 0.17   | 2704                           | 1242                          | 45.93  | 43.98    | Yes                           | Yes                                            |
| T11120C    | Functional     | 44058                          | 3                             | 0.01   | 2704                           | 0                             | 0.00   | 0.00     | No                            | No                                             |
| C12084T    | Functional     | 44058                          | 48                            | 0.11   | 2704                           | 2                             | 0.07   | 0.10     | No                            | No                                             |
| A13681G    | Functional     | 44058                          | 182                           | 0.41   | 2704                           | 10                            | 0.37   | 0.39     | No                            | No                                             |
| G13708A    | Functional     | 44058                          | 3154                          | 7.16   | 2704                           | 174                           | 6.43   | 7.20     | Yes                           | Yes                                            |
| C13802T    | Functional     | 44058                          | 34                            | 0.08   | 2704                           | 0                             | 0.00   | 0.06     | No                            | No                                             |
| A13966G    | Functional     | 44058                          | 536                           | 1.22   | 2704                           | 31                            | 1.15   | 1.26     | No                            | Yes                                            |
| C1476T     | Non-functional | 44058                          | n.i.a.#                       | n.i.a. | 2704                           | 2094                          | 77.44  | 76.91    | No                            | Yes                                            |
| A14793G    | Non-functional | 44058                          | 817                           | 1.85   | 2704                           | 39                            | 1.44   | 2.00     | No                            | Yes                                            |
| T14798C    | Functional     | 44058                          | 2837                          | 6.44   | 2704                           | 218                           | 8.06   | 6.56     | Yes                           | Yes                                            |
| A14927G    | Non-functional | 44058                          | 146                           | 0.33   | 2704                           | 15                            | 0.55   | 0.30     | No                            | Yes                                            |
| A15326G    | Non-functional | 44058                          | 13363                         | 30.33  | 2704                           | 2687                          | 99.37  | 98.67    | No                            | Yes                                            |
| C15452A    | Non-functional | 44058                          | 4025                          | 9.14   | 2704                           | 235                           | 8.69   | 9.33     | No                            | Yes                                            |
| G7977C     | Non-functional | 44058                          | 6                             | 0.01   | 2704                           | 0                             | 0.00   | 0.00     | No                            | No                                             |
| A8860G     | Non-functional | 44058                          | 13567                         | 30.79  | 2704                           | 2698                          | 99.78  | 98.48    | No                            | Yes                                            |
| 310InsC    | D-loop         | 44058                          | 0                             | 0.00   | 2704                           | n.i.a.                        | n.i.a. | 0.00     | No                            | No                                             |

\*HmtDB, mtDB and MitoMAP were accessed on 15/10/2020.

#n.i.a.: No information available.



**Table S4.** Summary of correlations between mtDNA parameters and ROS-stimulating drug IC50s, intracellular and mitochondrial ROS. #

| <b>MtDNA parameter</b>                 | <b>CDDP IC50s</b> | <b>DQA IC50s</b> | <b>Intracellular ROS</b> | <b>Mitochondrial ROS</b> |
|----------------------------------------|-------------------|------------------|--------------------------|--------------------------|
| <b>mtDNAcn</b>                         | 0.93*             | 0.99*            | 0.96**                   | 0.92*                    |
| <b>CI/III ns variations</b>            | 0.94*             | 0.97**           | 0.97**                   | 0.96*                    |
| <b>Functional CI/III ns variations</b> | 0.96**            | 0.95*            | 0.94*                    | 0.98**                   |

# Values are expressed as correlation coefficients along with their relevant significance (*p*-values): \**p*<0.05 and \*\**p*<0.01. CI/III: complex I/III; ns: non-synonymous.

**Table S5.** List of the primers designed to amplify 17 overlapping mtDNA fragments.

| Primer ID | Sequence               | Length | Start Position | End Position | Size (bp) |
|-----------|------------------------|--------|----------------|--------------|-----------|
| F1        | CCCTATTAACCACTCACGGG   | 20     | 17             | 36           | 1139      |
| R1        | CTGTGGCTCGTAGTGTCTG    | 20     | 1155           | 1136         |           |
| F2        | GATACCCCACTATGCTTAGCC  | 21     | 1079           | 1099         | 1114      |
| R2        | TTGGTGGCTGCTTTTAGGC    | 19     | 2192           | 2174         |           |
| F3        | CTGGTGATAGCTGGTTGTCC   | 20     | 2006           | 2025         | 1131      |
| R3        | CTTGTCCTTTCGTACAGGGAG  | 21     | 3137           | 3117         |           |
| F4        | GATCTGAGTTCAGACCGGAG   | 20     | 3063           | 3082         | 1103      |
| R4        | GTATGAGTTGGTCGTAGCGG   | 20     | 4165           | 4146         |           |
| F5        | AACATATGACGCACTCTCCC   | 20     | 4041           | 4060         | 1108      |
| R5        | TCGTGGTGCTGGAGTTTAAG   | 20     | 5148           | 5129         |           |
| F6        | ACCGTACAACCCTAACATAACC | 22     | 5051           | 5072         | 1150      |
| R6        | GTTGTTTATGCGGGGAAACG   | 20     | 6200           | 6181         |           |
| F7        | CCAGGCAACCTTCTAGGTAAC  | 21     | 6033           | 6053         | 1099      |
| R7        | CGTAGGTTTGGTCTAGGGTG   | 20     | 7131           | 7112         |           |
| F8        | TGTAGCCCACTTCCACTATG   | 20     | 7022           | 7041         | 1109      |
| R8        | GTTTGGTTTAGACGTCCGGG   | 20     | 8130           | 8111         |           |
| F9        | GTAGTACTCCCGATTGAAGCC  | 21     | 8009           | 8029         | 1153      |
| R9        | TAGGCTTGGATTAAGGCGAC   | 20     | 9161           | 9142         |           |
| F10       | CATTACTGCAGGCCACCTAC   | 20     | 9015           | 9034         | 1136      |
| R10       | ATGTAGCCGTTGAGTTGTGG   | 20     | 10150          | 10131        |           |
| F11       | ATAATCAACACCCTCTAGCC   | 21     | 10080          | 10100        | 1070      |
| R11       | CAAGGTGGGGATAAGTGTGG   | 20     | 11149          | 11130        |           |
| F12       | TCCAGTGAACCACTATCACG   | 20     | 11012          | 11031        | 1114      |
| R12       | CGGTAATGATGTCGGGGTTG   | 20     | 12125          | 12106        |           |
| F13       | ACACCTATCCCCATTCTCC    | 20     | 12076          | 12095        | 1072      |
| R13       | GGCTATTTTCTGCTAGGGGG   | 20     | 13147          | 13128        |           |
| F14       | CAGCCCAATTAGGTCTCCAC   | 20     | 13007          | 13026        | 1168      |
| R14       | TAATTGAGATTGCTCGGGGG   | 20     | 14174          | 14155        |           |
| F15       | TCCATCATCACCTCAACCCA   | 20     | 14056          | 14075        | 1081      |
| R15       | GCCTATGAAGGCTGTTGCTA   | 20     | 15136          | 15117        |           |
| F16       | CAGAAACCTGAAACATCGGC   | 20     | 15075          | 15094        | 1112      |
| R16       | GGGTTTGTATGTGGATTGGG   | 20     | 16186          | 16167        |           |
| F17       | GACTCACCCATCAACAACCG   | 20     | 16065          | 16084        | 1150      |
| R17       | TTTATGGGGTGATGTGAGCC   | 20     | 645            | 626          |           |
